# Supplementary material for: High Level of CD8+PD-1+ Cells in Patients with Chronic Myeloid Leukemia Who Experienced Loss of MMR after Imatinib Discontinuation
Source: MDPI journal article supplement (doi:10.3390/cells13080723), 2024-04-22
Supplement: s1 [file s1]

median: 21.96 vs 19.46%. Red color indicates statistical significance  $p < 0.05$ , blue color indicates tendency  $p < 0.1$ .

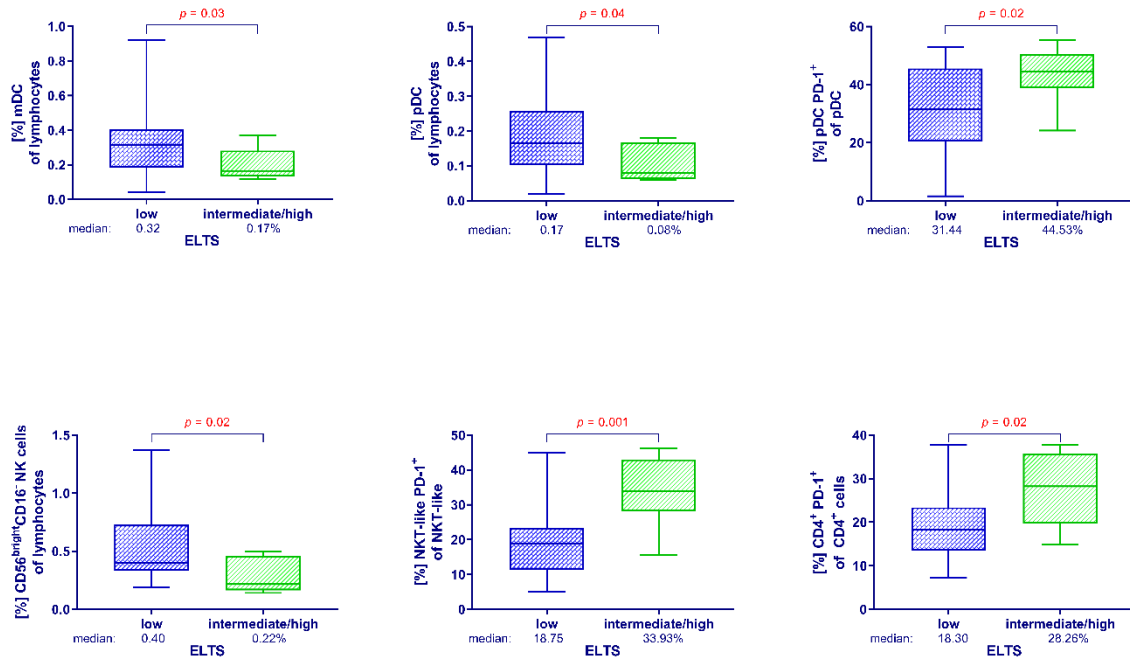

Figure S4. Immunological characteristics of patients classified according to the ELTS scores. Differences between the levels of DC, NK cells and populations with PD-1<sup>+</sup> in patients with low ELTS compared to patients with intermediate/high ELTS scores at 3 months (Mann-Whitney U test): mDC, median: 0.32 vs 0.17%; pDC, median: 0.17 vs 0.08%; pDC PD-1<sup>+</sup>, median: 31.44 vs 44.53%; CD56<sup>bright</sup>CD16<sup>-</sup>, median: 0.40 vs 0.22%; NKT-like PD-1<sup>+</sup>, median: 18.75 vs 33.93%; CD4<sup>+</sup>PD-1<sup>+</sup>, median: 18.30 vs 28.26%. Red color indicates statistical significance  $p < 0.05$ , blue color indicates tendency  $p < 0.1$ .
